# Supplementary material for: Ionothermal synthesis of microporous and mesoporous carbon aerogels from fructose as electrode materials for supercapacitors
Source: Royal Society of Chemistry journal article supplement (doi:10.1039/c6ta00681g), 2016-01-01
Supplement: c6ta00681g1.pdf [file c6ta00681g1.pdf]

## Supporting information

### Ionothermal synthesis of microporous and mesoporous carbon areogels from fructose for dye removal from water

Xiao-Xiao Lin<sup>1</sup>, Bin Tan<sup>1</sup>, Lu Peng<sup>1</sup>, Zhao-Feng Wu<sup>2</sup> and Zai-Lai Xie<sup>1\*</sup>

Address:

1. College of Chemistry, Fuzhou University

Qishan Campus, 2 Xueyuan Road, Fujian 350116, P.R. China

E-mail: [zlxie@fzu.edu.cn](mailto:zlxie@fzu.edu.cn)

2. Zhao-Feng Wu

State Key Laboratory of Structural Chemistry, Fujian Institute of Research on  
the Structure of Matter, The Chinese Academy of Sciences, Fuzhou, Fujian  
350002, P.R. China

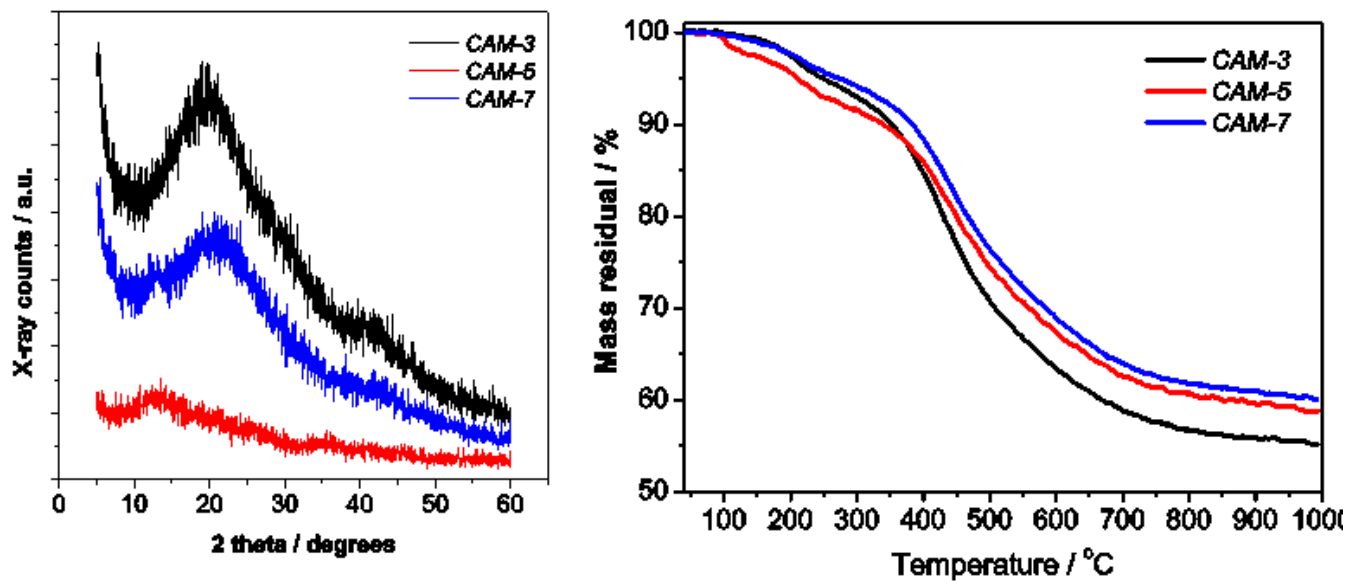

Figure S1. X-ray diffraction data of the ionothermal carbons at 180 0C.

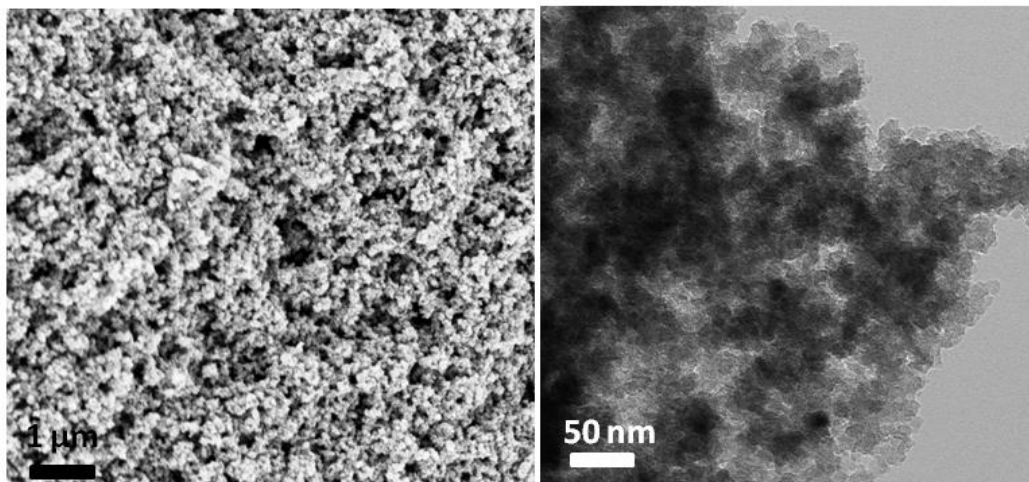

Figure S2. SEM and TEM images of CAM-5-850.

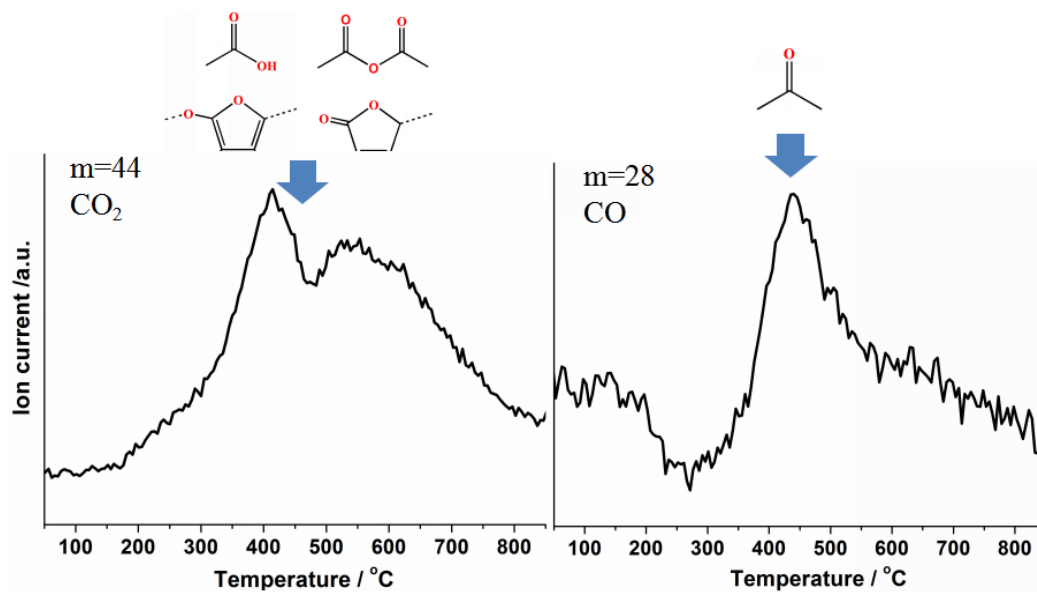

**Figure S3. MS signal of the sample CAM-5.**

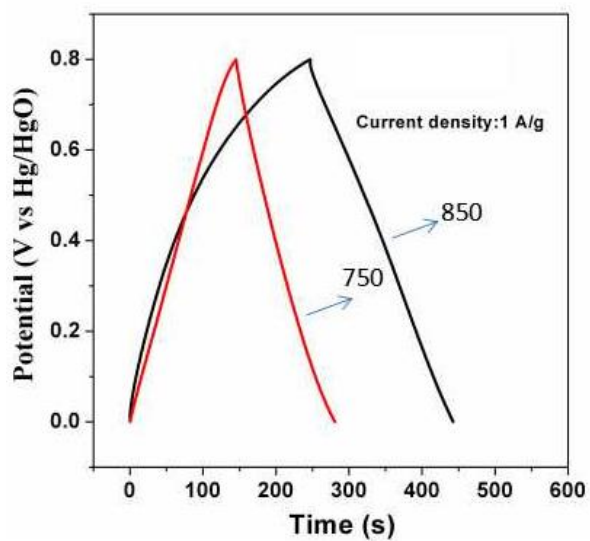

**Figure S4. the specific capacitance of CAM-5-750 and CAM-5-850 at current density of 1 A g<sup>-1</sup>.**

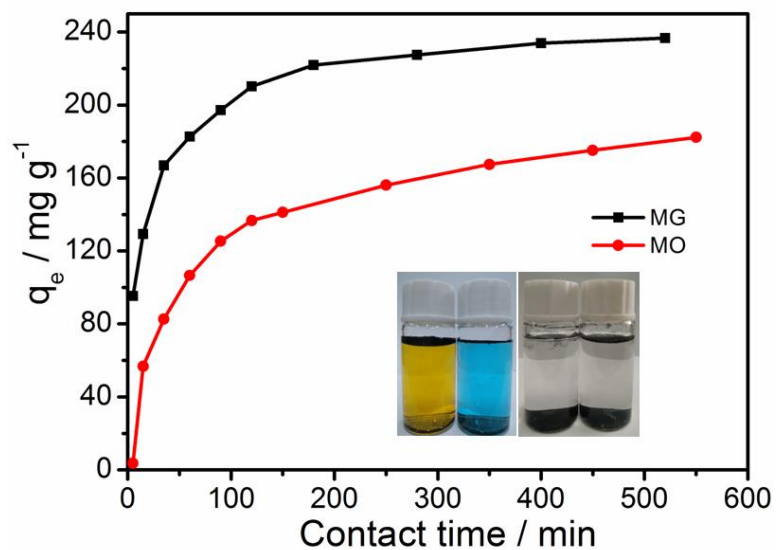

**Figure S5. The removal capacity of CAM-5-850 toward MO and MG dyes.**
